# Supplementary material
Source: Springer Nature journal article supplement (https://www.springermedizin.de/resource/supplementary/12883_2011_535_MOESM3_ESM.pdf/9455358)

**A**S1 ( $\mu$ l)

2

5

kDa

29.3

17.4

T1 Fc Pc Tc Oc Hi Ec Cn Av Dm Plv Ce

Thalamus

**B**

5

kDa

29.3

17.4

Av Dm Plv

Thalamus

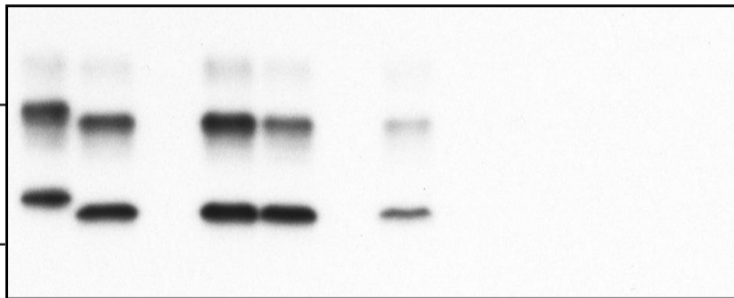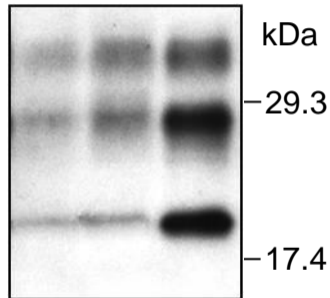

Supplement: MOESM3 [file 9455358]
